# Supplementary material for: Dexamethasone Loaded Liposomes by Thin-Film Hydration and Microfluidic Procedures: Formulation Challenges
Source: MDPI journal article supplement (doi:10.3390/ijms21051611), 2020-02-26
Supplement: s1 [file s1]

Supplementary Materials:

# Dexamethasone Loaded Liposomes by Thin-Film Hydration and Microfluidic Procedures: Formulation Challenges

MD Al-Amin, Federica Bellato, Francesca Mastrotto, Mariangela Garofalo, Alessio Malfanti, Stefano Salmaso \* and Paolo Caliceti

Department of Pharmaceutical and Pharmacological Sciences, University of Padova, Via F. Marzolo 5, 35131 Padova, Italy; md.alamin@studenti.unipd.it (M.A.-A.); federica.bellato@phd.unipd.it (F.B.); francesca.mastrotto@unipd.it (F.M.); marinagela.garofalo@unipd.it (M.G.); alessio.malfanti89@gmail.com (A.M.); paolo.caliceti@unipd.it (P.C.)

\* Correspondence: stefano.salmaso@unipd.it; Tel.: +39-04-9827-1602

**Table S1.** Statistical analysis of IL-6 release by ARPE-19 cells activated by LPS and incubated with liposomes or free dexamethasone hemisuccinate as reported in Figure 10.

| Formulations | H<br>(1 µM) | H<br>(10 µM) | HE<br>(1 µM) | HE<br>(10 µM) | M<br>(1 µM) | M<br>(10 µM) | ME<br>(1 µM) | ME<br>(10 µM) | DMS<br>(1 µM) | DMS<br>(10 µM) |
|--------------|-------------|--------------|--------------|---------------|-------------|--------------|--------------|---------------|---------------|----------------|
| PC           | 0.0018      | 0.0004       | 0.1738       | 0.96          | 0.0004      | 0.0002       | 0.3          | 0.8           | 0.014         | 0.0015         |
| DMS (1 mM)   | 0.0028      |              |              |               | <0.0001     |              |              |               |               |                |
| DMS (10 mM)  | 0.0023      |              |              |               | 0.0002      | 0.02         |              |               |               |                |
| H (1 mM)     |             |              |              |               | 0.05        |              |              |               |               |                |
| H (10 mM)    |             |              |              |               |             | 0.028        |              |               |               |                |

Abbreviations: PC, Positive control (cells treated with only LPS); H, dexamethasone hemisuccinate loaded liposomes obtained by thin layer rehydration; HE, empty liposomes obtained by thin layer rehydration; M, dexamethasone hemisuccinate loaded liposomes obtained by microfluidics; ME, empty liposomes obtained by microfluidics; DMS, dexamethasone hemisuccinate in solution. Drug concentration is reported in brackets.

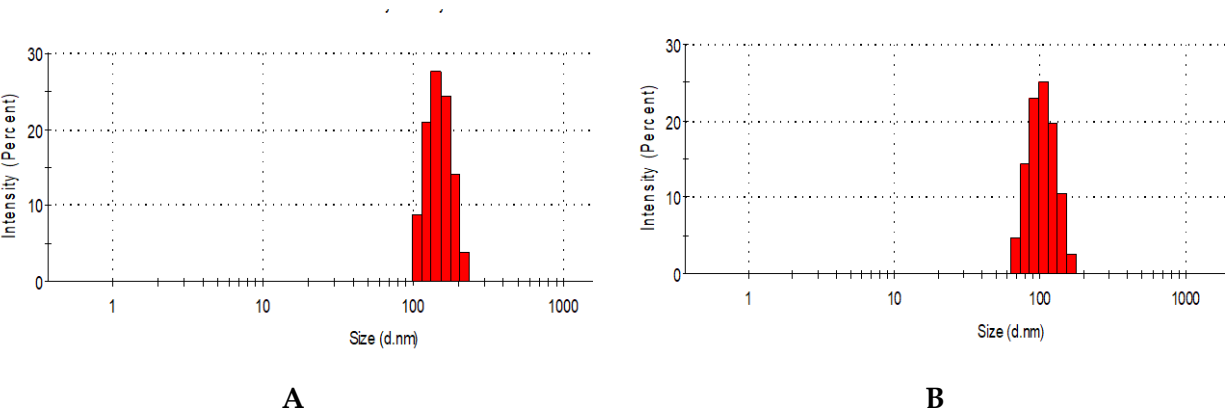

**Figure S1.** Size distribution (by intensity) of dexamethasone-hemisuccinate loaded liposomes obtained by thin layer rehydration (A) and microfluidic (B) procedures. Liposomes were assembled with 0.2 M calcium acetate and loaded by incubation for one hour with dexamethasone hemisuccinate at 10 and 2.5 mg/mL concentration of lipids and drug, respectively.

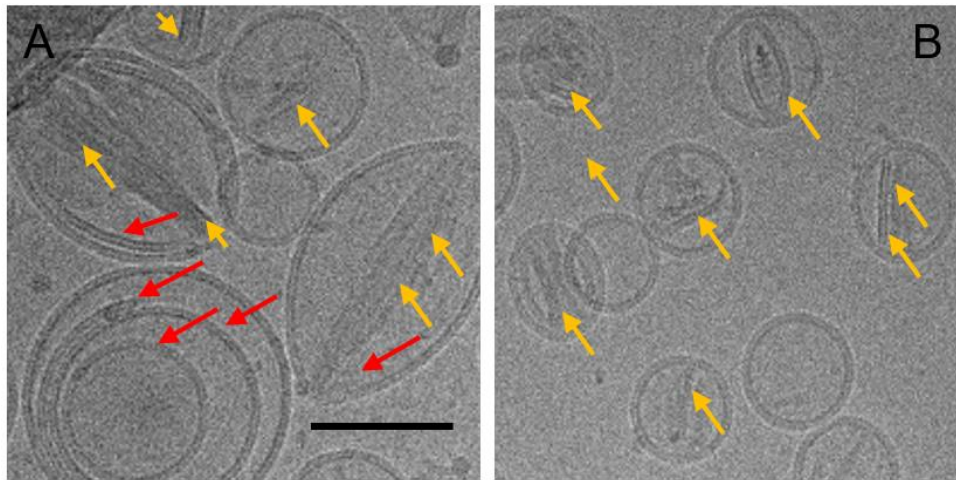

**Figure S2.** Cryo-TEM image of dexamethasone hemisuccinate loaded liposomes obtained by thin layer rehydration (**A**) and microfluidic (**B**). Images report a magnified field of Figure 5. Red harrows indicate lamellae in multilamellar vesicles; yellow harrows indicate calcium-dexamethasone hemisuccinate nanocrystalline complexes. Liposomes were assembled with 0.2 M Calcium acetate and loaded by incubation for one hour with dexamethasone hemisuccinate at 10 and 2.5 mg/mL concentration of lipid and drug, respectively. Size bar: 100 nm.

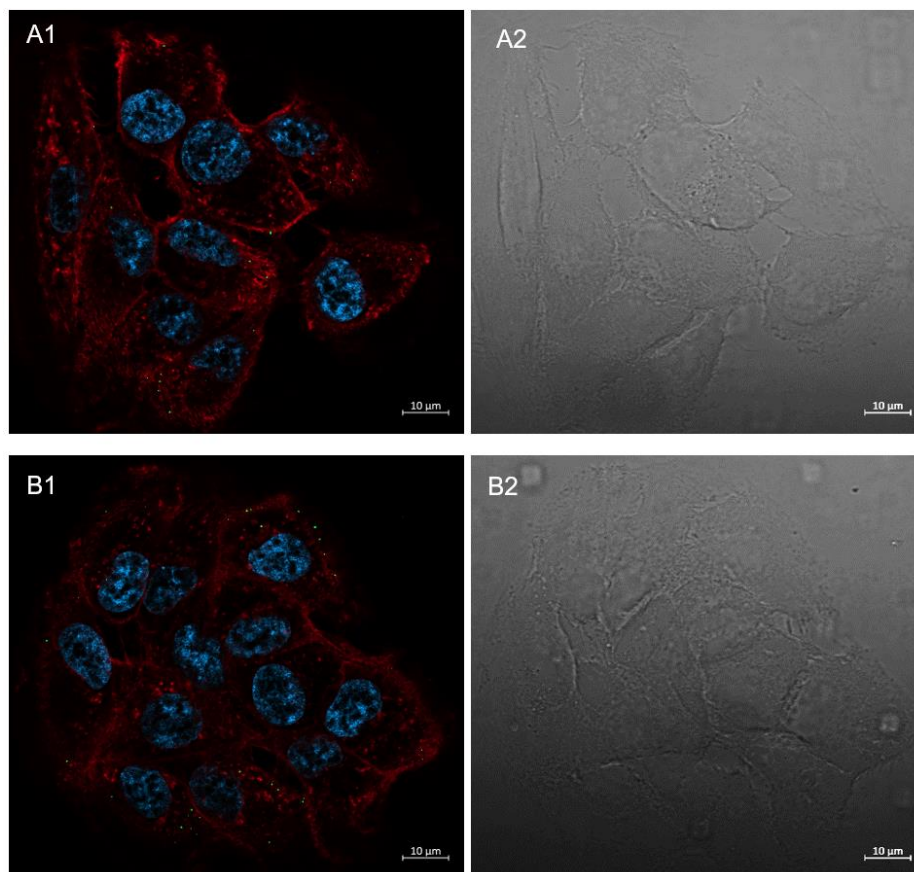

**Figure S3.** Confocal images of ARPE-19 cells incubated with dexamethasone hemisuccinate loaded liposomes obtained by thin-film hydration (**A1**) and microfluidics (**B1**). Liposomes were labelled with fluorescein-DHPE (green), cell membrane with wheat germ agglutinin-Alexa fluor-633 (red), nuclei with DAPI (blue). Panel **A2** and **B2** are the corresponding bright fields of images of panel A1 and B1, respectively. Images were captured on a large field from which the magnifications of Figure 9C and D were generated.

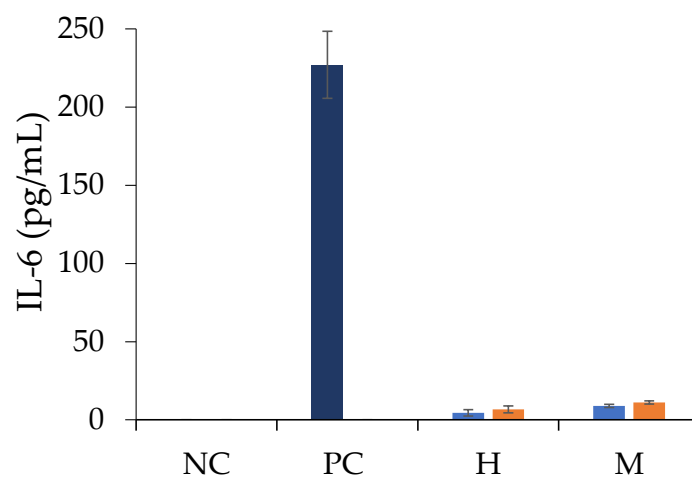

**Figure S4.** In vitro IL-6 release by ARPE-19 cells. Cells were treated with plain liposomes (no drug loaded) at lipid concentrations equivalent to those of the 1 (■) and 10 (■)  $\mu$ M Dexamethasone hemisuccinate loaded liposomes. LPS stimulation was applied only in positive control (PC). Abbreviations: NC: negative control (non-treated cells); PC: positive control (cells treated with only LPS); H: cells incubated with plain liposomes obtained by thin-layer hydration; M: cells incubated with plain liposomes obtained by microfluidics.
